# Supplementary material for: Endothelial Colony Forming Cells as an Autologous Model to Study Endothelial Dysfunction in Patients with a Bicuspid Aortic Valve
Source: PubMed Central journal article supplement (PMC6651394; doi:10.3390/ijms20133251), 2019-07-02
Supplement: ijms-20-03251-s001.pdf [file ijms-20-03251-s001.pdf]

**Supplementary Materials: Primer sequences for qPCR.**

| <b>gene</b> | <b>forward*</b>          | <b>reverse*</b>        |
|-------------|--------------------------|------------------------|
| GAPDH       | AGCCACATCGCTCAGACAC      | GCCCAATACGACCAAATCC    |
| ARP         | CACCATTGAAATCCTGAGTGATGT | TGACCAGCCGAAAGGAGAAG   |
| PECAM1      | ATCGGTTGTTCAATGCGTCC     | CCTTCAGGATTGGTACATGACA |
| VE-Cadherin | CTGCATCCTCACCATCACAG     | ACCGACACATCGTAGCTGGT   |
| Transgelin  | TTCAAGCAGATGGAGCAGGT     | TGCCATGTCCTTGCCTTCAA   |
| Fibronectin | CGTCATAGTGGAGGCACTGA     | CAGACATTCGTTCCCACTCA   |
| SNAI1       | GAGGACAGTGGGAAAGGCTC     | TGGCTTCGGATGTGCATCTT   |
| PiT1        | GTTCGTGCATTATCCTCCAT     | TGGTACCCACAGAGGAAGTTT  |
| PiT2        | TCTCATGGCTGGGGAAGTTAGT   | TTGCGACCAGTGAGAATCCTAT |
| CD45        | ATAGTCTGCCACGCCTCTG      | AGTGTGAAGCGGCCAATG     |

\* 5'end to 3'end.
